# Supplementary material for: Microwave-Assisted Photocatalytic Degradation of Organic Pollutants via CNTs/TiO2
Source: MDPI journal article supplement (doi:10.3390/catal12090940), 2022-08-24
Supplement: s1 [file s1]

Supplementary materials

# Microwave-Assisted Photocatalytic Degradation of Organic Pollutants via CNTs/TiO<sub>2</sub>

Yuqing Ren <sup>†</sup>, Yao Chen <sup>†</sup>, Qinyu Li <sup>†</sup>, Hexing Li <sup>\*</sup> and Zhenfeng Bian <sup>\*</sup>

MOE Key Laboratory of Resource Chemistry and Shanghai Key Laboratory of Rare Earth Functional Materials, Shanghai Normal University, Shanghai 200234, China; ryq18109618310@163.com (Y.R.); 20110220075@fudan.edu.cn (Y.C.); qingyu.l@outlook.com (Q.L.)

<sup>\*</sup> Correspondence: hexing-li@shnu.edu.cn. (H.L.); bianzhenfeng@shnu.edu.cn (Z.B.)

<sup>†</sup> These authors contributed equally to this work.

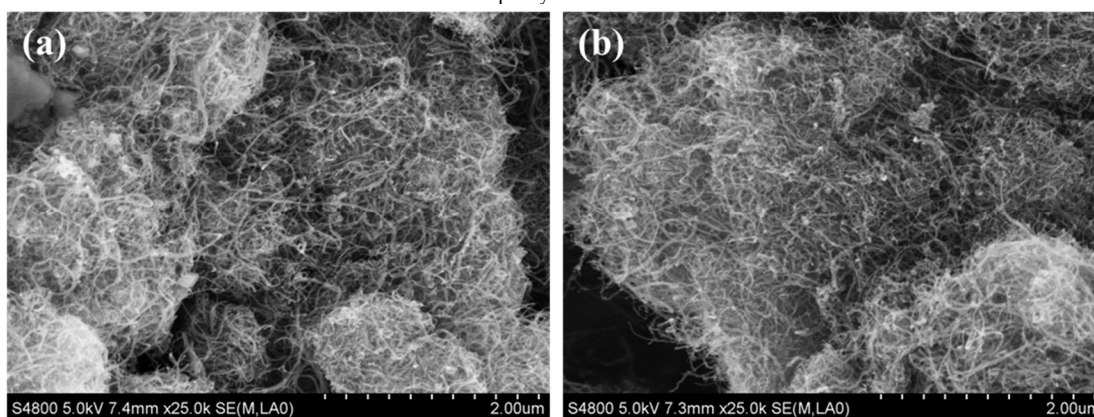

**Figure S1.** The SEM image of (a) CNTs and (b) acidified CNTs (ACNTs).

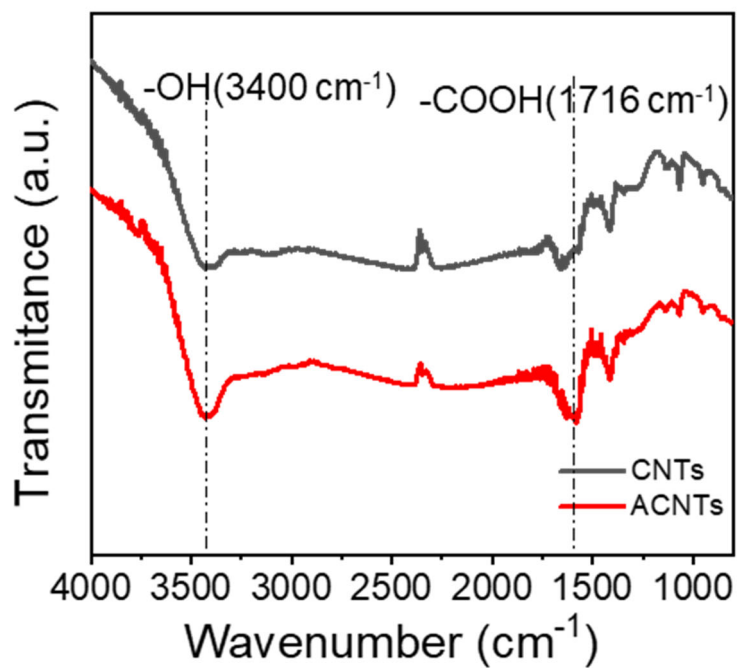

**Figure S2.** FTIR spectra of CNTs and ACNTs.

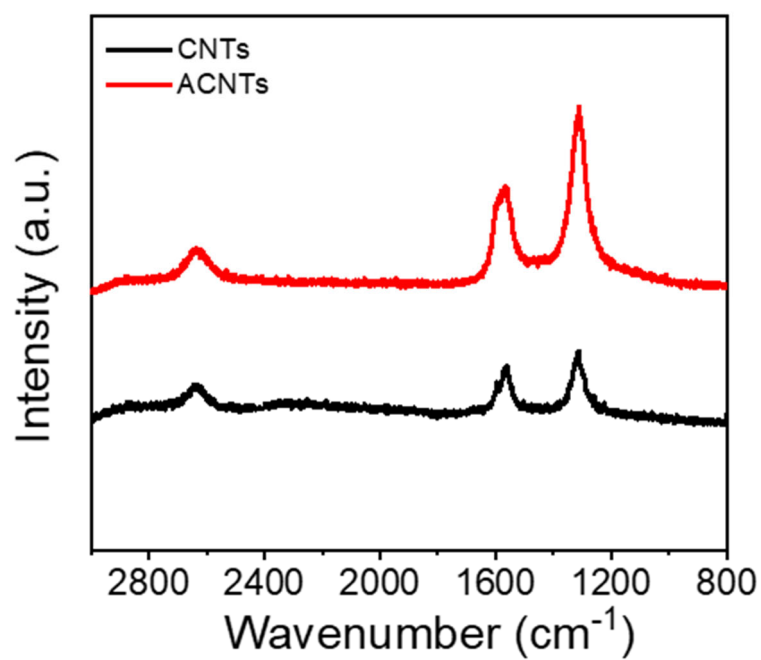

**Figure S3.** Raman spectrum of CNTs and ACNTs.

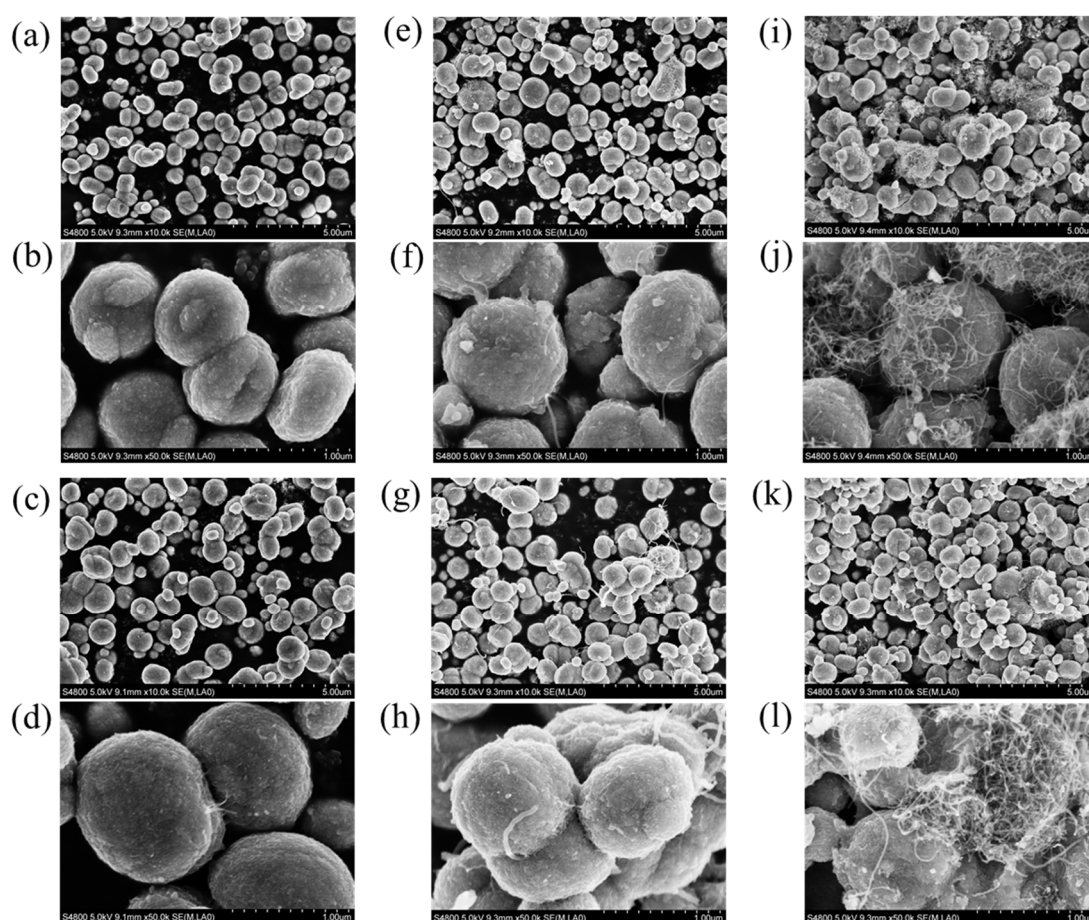

**Figure S4.** SEM images of  $\text{TiO}_2$  (a, b), 5CNTs/ $\text{TiO}_2$  (c, d), 10CNTs/ $\text{TiO}_2$  (e, f), 15CNTs/ $\text{TiO}_2$  (g, h), 20CNTs/ $\text{TiO}_2$  (i, j) and 30CNTs/ $\text{TiO}_2$  (k, l).

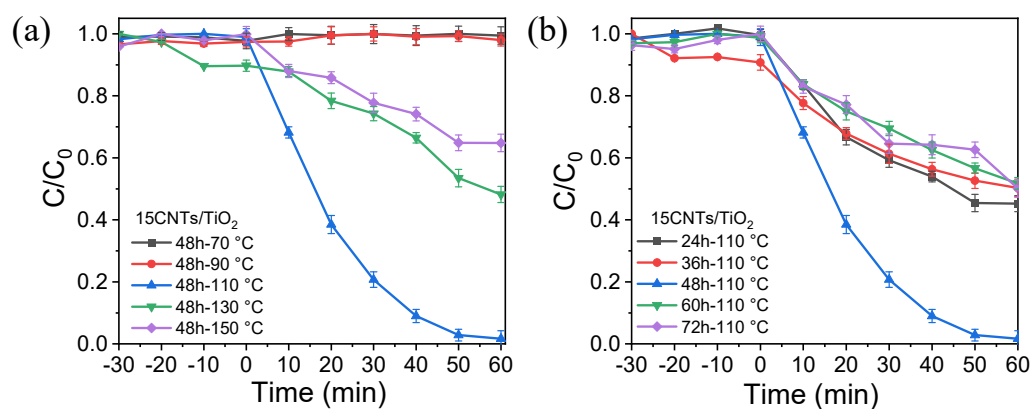

**Figure S5.** (a) Degradation activity of different 15CNTs/TiO<sub>2</sub> under microwave and UV irradiation for 1 hour. (b) Degradation activity of different 15CNTs/TiO<sub>2</sub> under microwave and UV irradiation for 1 hour.

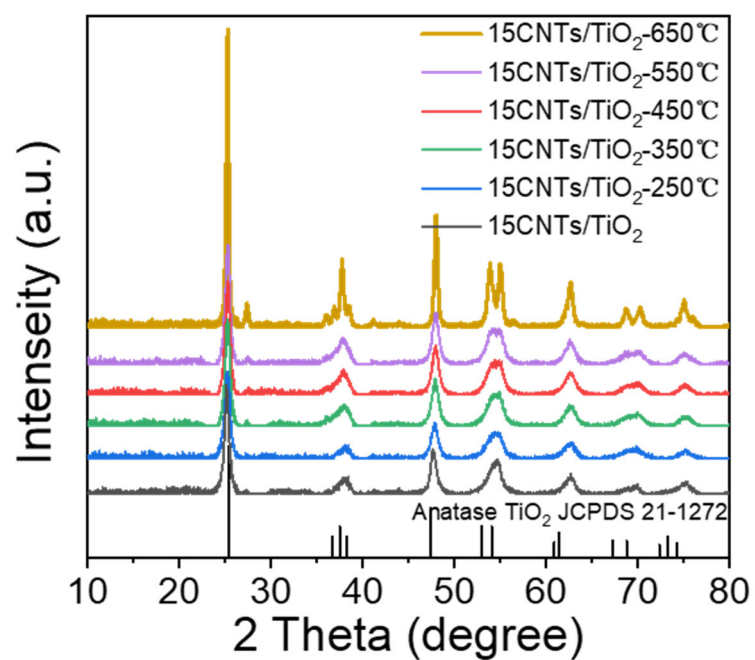

**Figure S6.** XRD spectra of 15CNTs/TiO<sub>2</sub> calcined at different temperatures.

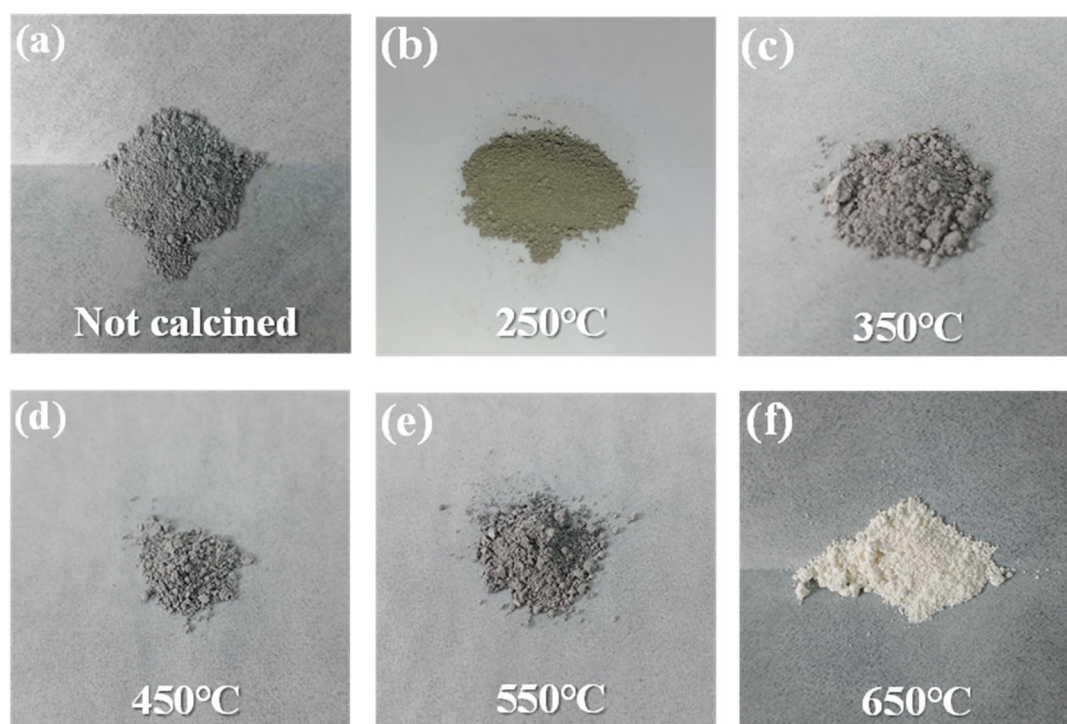

**Figure S7.** Photographs of 15CNTs/TiO<sub>2</sub> calcined at different temperatures.

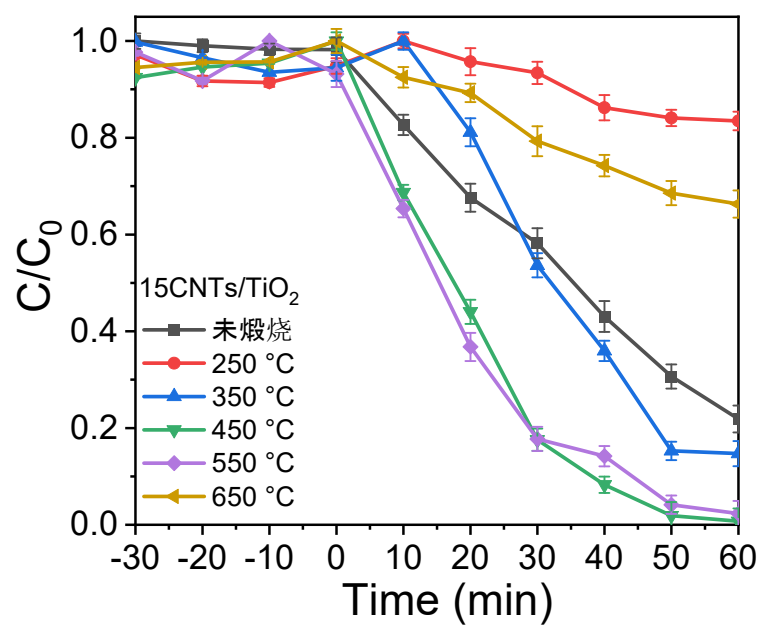

Figure S8. Degradation activity of 15CNTs/TiO<sub>2</sub> calcined at different temperatures.



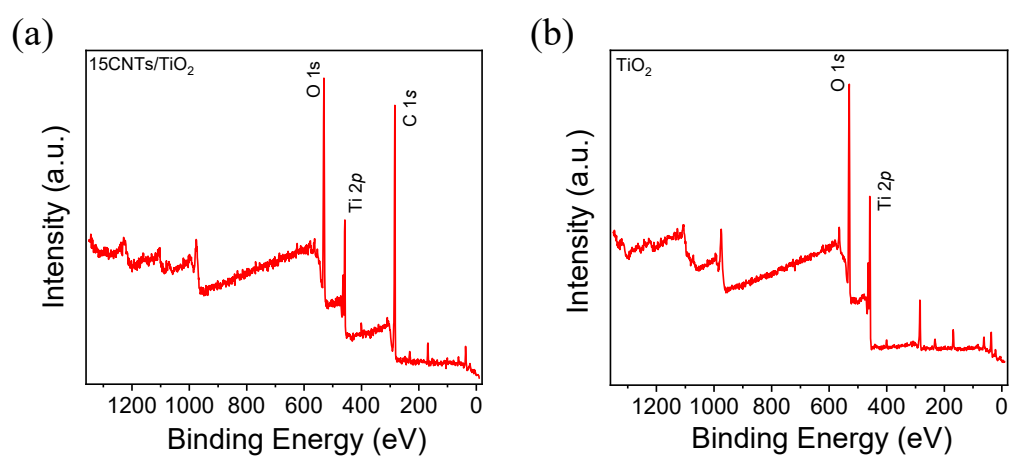

**Figure S9.** The XPS spectra of 15CNTs/TiO<sub>2</sub> (a) and TiO<sub>2</sub> (b).

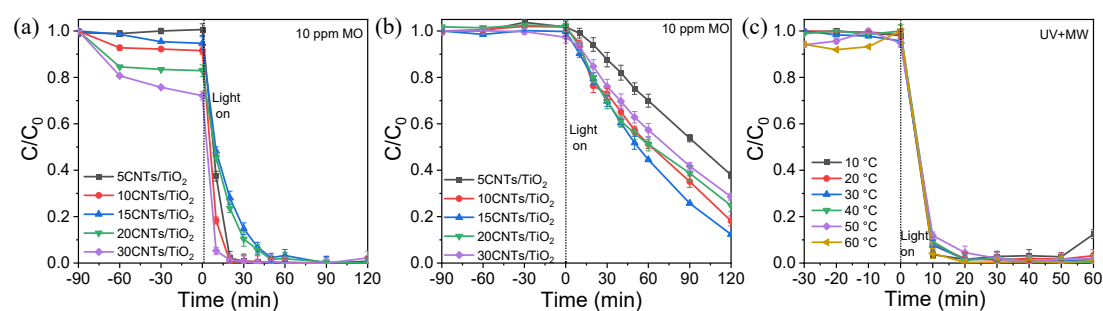

**Figure S10.** The degradation activity of xCNTs/TiO<sub>2</sub> under microwave and UV irradiation in (a) 10 ppm and (b) 40 ppm MO. (c) The degradation activity of 15CNTs/TiO<sub>2</sub> under microwave and UV irradiation in 20 ppm MO with different temperatures.

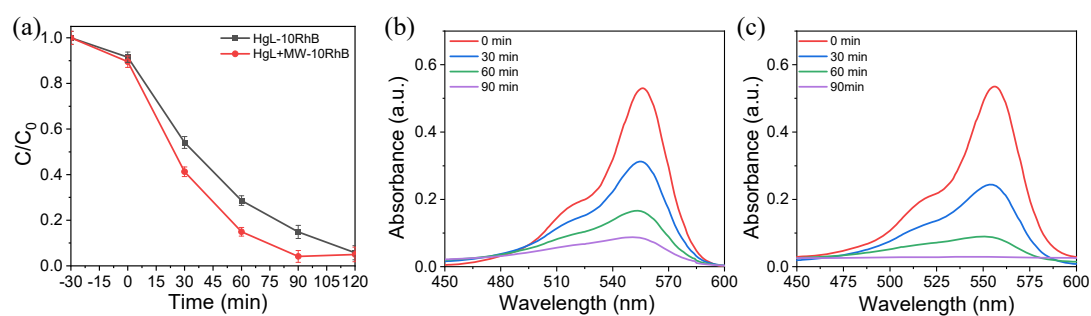

**Figure S11.** (a) The RhB degradation activity of 15CNTs/TiO<sub>2</sub> under different conditions. The UV-vis spectra of RhB degraded by 15CNTs/TiO<sub>2</sub> at different times under (b) ultraviolet alone (UV) and (c) UV illumination and Microwave radiation conditions.

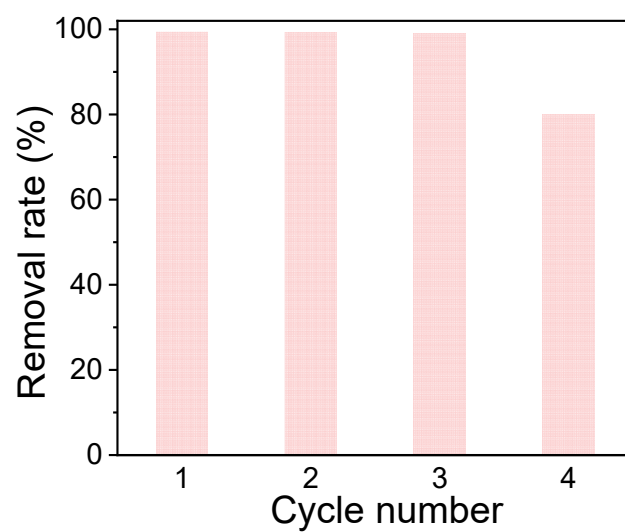

**Figure S12.** Recycling test of 15CNTs/TiO<sub>2</sub> for MO degradation under microwave and UV irradiation.

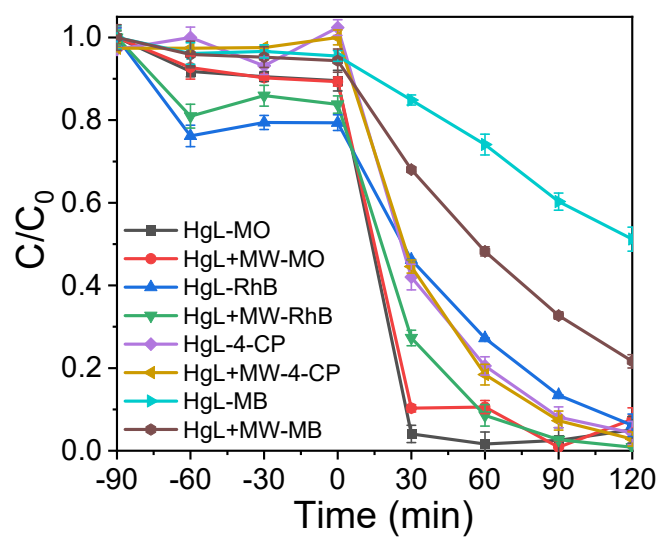

**Figure S13.** The microwave-photocatalytic degradation of 4-CP, MB, and RhB by 15CNTs/TiO<sub>2</sub>.
